# TABLE OF CONTENTS

# ANESTHESIOLOGY

Volume 134  
Issue 2  
February 2021

|                                                  |     |
|--------------------------------------------------|-----|
| ◆ This Month in ANESTHESIOLOGY .....             | 1A  |
| Science, Medicine, and the Anesthesiologist..... | 13A |
| Infographics in Anesthesiology .....             | 17A |

## ◆ Editorials

|                                                                                                  |     |
|--------------------------------------------------------------------------------------------------|-----|
| Liposomal Bupivacaine: Effective, Cost-effective, or (Just) Costly?<br><i>M. E. McCann</i> ..... | 139 |
|--------------------------------------------------------------------------------------------------|-----|

|                                                                                                                                   |     |
|-----------------------------------------------------------------------------------------------------------------------------------|-----|
| Optimal Tranexamic Acid Dosing Regimen in Cardiac Surgery:<br>What Are the Missing Pieces?<br><i>D. Faraoni, J. H. Levy</i> ..... | 143 |
|-----------------------------------------------------------------------------------------------------------------------------------|-----|

## Perioperative Medicine

### CLINICAL SCIENCE

|                                                                                                                                                                                                                                                                                                                                                         |     |
|---------------------------------------------------------------------------------------------------------------------------------------------------------------------------------------------------------------------------------------------------------------------------------------------------------------------------------------------------------|-----|
|  ◆ ◆ Perineural Liposomal Bupivacaine Is Not Superior to Nonliposomal Bupivacaine for Peripheral Nerve Block Analgesia: A Systematic Review and Meta-analysis<br><i>N. Hussain, R. Brull, B. Sheehy, M. K. Essandoh, D. L. Stahl, T. E. Weaver, F. W. Abdallah</i> ..... | 147 |
|---------------------------------------------------------------------------------------------------------------------------------------------------------------------------------------------------------------------------------------------------------------------------------------------------------------------------------------------------------|-----|

Nine trials were included in a meta-analysis examining the difference in 24- to 72-h rest pain severity scores for liposomal and nonliposomal bupivacaine. The area under the curve pain scores for the 24- to 72-h period were statistically but probably not clinically significant. Secondary outcome analysis likewise failed to uncover benefits for liposomal bupivacaine regarding analgesic consumption, length of stay, and functional recovery.

|                                                                                                                                                                                                                                                                                        |     |
|----------------------------------------------------------------------------------------------------------------------------------------------------------------------------------------------------------------------------------------------------------------------------------------|-----|
|  ◆ ◆ Exposure–Response Relationship of Tranexamic Acid in Cardiac Surgery: A Model-based Meta-analysis<br><i>P. J. Zufferey, J. Lanoiselée, B. Graouch, B. Vieille, X. Delavenne, E. Ollier</i> ..... | 165 |
|----------------------------------------------------------------------------------------------------------------------------------------------------------------------------------------------------------------------------------------------------------------------------------------|-----|

This model-based meta-analysis found that low-dose tranexamic acid (total dose, approximately 20 mg/kg) was sufficient to reduce postoperative blood loss and erythrocyte transfusion in cardiopulmonary bypass surgery. Although higher tranexamic acid doses were found to achieve a marginal gain in effectiveness, they increased the risk of postoperative seizure, particularly in procedures involving a high risk of bleeding. **SUPPLEMENTAL DIGITAL CONTENT IS AVAILABLE IN THE TEXT**

|                                                                                                                                                                                                                                                                                                          |     |
|----------------------------------------------------------------------------------------------------------------------------------------------------------------------------------------------------------------------------------------------------------------------------------------------------------|-----|
|  ◆ ◆ Intraoperative Blood Pressure Monitoring in Obese Patients: Arterial Catheter, Finger Cuff, and Oscillometry<br><i>R. Schumann, A. S. Meidert, I. Bonney, C. Koutentis, W. Wesselink, K. Kouz, B. Saugel</i> ..... | 179 |
|----------------------------------------------------------------------------------------------------------------------------------------------------------------------------------------------------------------------------------------------------------------------------------------------------------|-----|

In a study of 90 obese patients having bariatric surgery, the agreement between finger cuff and intraarterial measurements was better than the agreement between oscillometric and intraarterial measurements for mean arterial and diastolic blood pressure, but not systolic blood pressure. Forearm oscillometry demonstrated better measurement performance than upper arm or lower leg oscillometry. **SUPPLEMENTAL DIGITAL CONTENT IS AVAILABLE IN THE TEXT**

◆ Refers to This Month in ANESTHESIOLOGY  
◆ Refers to Editorial  
 This article has an Audio Podcast

 See Supplemental Digital Content  
 CME Article  
 This article has a Video Abstract

 Part of the Letheon writing competition  
 This article has a Visual Abstract  
 This article is Open Access

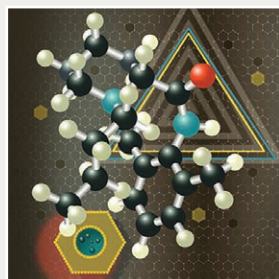

**ON THE COVER:** Liposomal bupivacaine is purported to extend analgesia associated with wound infiltration and peripheral nerve blocks. However, evidence of the clinical effectiveness of liposomal bupivacaine is mixed. In this issue of ANESTHESIOLOGY, Hussain *et al.* present a meta-analysis to evaluate the effectiveness of perineural liposomal bupivacaine in improving peripheral nerve block analgesia as compared to nonliposomal local anesthetics. In the same issue, Ilfeld *et al.* provide a comprehensive summary of all currently published randomized controlled trials involving the clinical administration of liposomal bupivacaine to control postoperative pain. In an accompanying editorial, McCann reviews the history of clinical trial data and approval of liposomal bupivacaine by the U. S. Food and Drug Administration. Cover Illustration: A. Johnson, Vivo Visuals.

- Hussain *et al.*: Perineural Liposomal Bupivacaine Is Not Superior to Nonliposomal Bupivacaine for Peripheral Nerve Block Analgesia: A Systematic Review and Meta-analysis, p. 147
- Ilfeld *et al.*: Clinical Effectiveness of Liposomal Bupivacaine Administered by Infiltration or Peripheral Nerve Block to Treat Postoperative Pain: A Narrative Review, p. 283
- McCann: Liposomal Bupivacaine: Effective, Cost-effective, or (Just) Costly? p. 139

- 
**Intraoperative Oxygen Concentration and Neurocognition after Cardiac Surgery: A Randomized Clinical Trial**  

*S. Shaefi, P. Shankar, A. L. Mueller, B. P. O'Gara, K. Spear, K. R. Khabbaz, A. Bagchi, L. M. Chu, V. Banner-Goodspeed, D. E. Leaf, D. S. Talmor, E. R. Marcantonio, B. Subramaniam* .....189

A total of 100 cardiac surgical patients were randomly assigned to 35 or 100% inspired oxygen before and after cardiopulmonary bypass. Neurocognitive function 2 days, 1 month, 3 months, and 6 months after surgery was similar in each group. Supplemental intraoperative oxygen does not worsen postoperative neurocognitive function. Inspired oxygen fraction should be chosen on the basis of other considerations. *SUPPLEMENTAL DIGITAL CONTENT IS AVAILABLE IN THE TEXT*

- 
**An Electroencephalogram Metric of Temporal Complexity Tracks Psychometric Impairment Caused by Low-dose Nitrous Oxide**  

*X. C. E. Vrijdag, H. van Waart, S. J. Mitchell, J. W. Sleight* .....202

A quantitative electroencephalogram analysis can identify associations between treatment with low-dose nitrous oxide and performance on psychometric tests. Temporal complexity decreases in the medial cortical regions during nitrous oxide administration and is correlated with psychometric performance. *SUPPLEMENTAL DIGITAL CONTENT IS AVAILABLE IN THE TEXT*

## BASIC SCIENCE

- 

**Fast-spiking Interneurons Contribute to Propofol-induced Facilitation of Firing Synchrony in Pyramidal Neurons of the Rat Insular Cortex**  
*Y. Koyanagi, Y. Oi, M. Kobayashi* .....219

Multiple whole cell patch clamp recordings in rat cortical slices reveal that propofol facilitates firing synchrony among pyramidal neurons. Propofol-induced activation of presynaptic fast-spiking interneurons was necessary to achieve firing synchrony of postsynaptic pyramidal neurons. These observations suggest that propofol facilitates pyramidal neuron firing synchrony in the cerebral cortex by enhancing inhibitory inputs from fast-spiking interneurons.

- 
**Molecular Modification of Transient Receptor Potential Canonical 6 Channels Modulates Calcium Dyshomeostasis in a Mouse Model Relevant to Malignant Hyperthermia**  
*J. R. Lopez, A. Uryash, J. Adams, P. M. Hopkins, P. D. Allen* .....234

Muscle-specific overexpression of the nonconducting transient receptor potential canonical 6 channel both reduced intracellular  $\text{Ca}^{2+}$  concentration in RYR1-p.R163C mice at rest and reduced the absolute maximum levels of intracellular  $\text{Ca}^{2+}$  concentration reached during exposure to halothane. Despite this, its overexpression did not restore intracellular  $\text{Ca}^{2+}$  concentration to wild-type levels, and although its overexpression increased the length of survival after halothane exposure, it was unable to rescue the lethal phenotype. *SUPPLEMENTAL DIGITAL CONTENT IS AVAILABLE IN THE TEXT*

## Education

### IMAGES IN ANESTHESIOLOGY

- 
**Using Left Ventricular Assist Device Doppler Assessment to Understand Pump–Patient Interactions during a Venous Arterial–Extracorporeal Membrane Oxygenation Weaning Trial**  
*S. P. De Ridder, S. Jacobs, D. F. Dauwe* .....248

*SUPPLEMENTAL DIGITAL CONTENT IS AVAILABLE IN THE TEXT*

### CLINICAL FOCUS REVIEW

- Perioperative Blood Pressure Management**  
*B. Saugel, D. I. Sessler* .....250

Intraoperative hypotension is common during noncardiac surgery and associated with myocardial injury, acute kidney injury, and death. Postoperative hypotension is also common and associated with myocardial injury and death, and largely missed by conventional monitoring.

- 
**“Silent” Presentation of Hypoxemia and Cardiorespiratory Compensation in COVID-19**  
*P. E. Bickler, J. R. Feiner, M. S. Lipnick, W. McKleroy* .....262

Severe hypoxemia presents variably, and sometimes silently, without subjective complaints of dyspnea. The adequacy of cardiovascular compensation for oxygen delivery to tissues should be a focus in all hypoxemic patients.

- Acute Respiratory Distress Syndrome: Contemporary Management and Novel Approaches during COVID-19**  
*G. W. Williams, N. K. Berg, A. Reskallah, X. Yuan, H. K. Eltzschig* .....270

Acute respiratory distress syndrome remains a condition that carries a high mortality. Evidence-based clinical management and emerging concepts for new therapies for COVID-19 are reviewed.

### REVIEW ARTICLE

- 

**Clinical Effectiveness of Liposomal Bupivacaine Administered by Infiltration or Peripheral Nerve Block to Treat Postoperative Pain: A Narrative Review**  

*B. M. Ilfeld, J. C. Eisenach, R. A. Gabriel* .....283

This review summarizes the evidence from randomized, controlled trials for the use of liposomal bupivacaine in providing postoperative analgesia. The preponderance of evidence fails to support the routine use of liposomal bupivacaine over standard local anesthetics.

### MIND TO MIND

- Dying Alone**  
*K. L. Goff* .....345

- Behind the Mask**  
*A. E. Holman, V. T. Gauger* .....346

## Correspondence

|                                                                                                                                                                    |     |
|--------------------------------------------------------------------------------------------------------------------------------------------------------------------|-----|
| <b>Perioperative Management of Glucose-lowering Drugs: Comment</b><br><i>S. H. Gregory</i> .....                                                                   | 349 |
| <b>Perioperative Management of Glucose-lowering Drugs: Comment</b><br><i>V. Thiruvengadathan, D. Jesudason, N. Nanjappa, E. J. Meyer,<br/>R. M. Van Wijk</i> ..... | 349 |
| <b>Perioperative Management of Glucose-lowering Drugs: Reply</b><br><i>J.-C. Preiser, M. Cnop</i> .....                                                            | 350 |
| <b>Burst-suppression and Postoperative Delirium: Comment</b><br><i>H. P. Grocott</i> .....                                                                         | 351 |
| <b>Burst-suppression and Postoperative Delirium: Reply</b><br><i>J. C. Pedemonte, J. J. Locascio, T. Houle, O. Akeju</i> .....                                     | 352 |
| <b>Balanced Crystalloid versus 0.9% Sodium Chloride: What We<br/>Overlook in Our Research</b><br><i>A. Kasatkin, A. Urakov, A. Nigmatullina, M. Kopytov</i> .....  | 353 |

## A Contemporary Reading List

|                             |     |
|-----------------------------|-----|
| <i>A. J. Schwartz</i> ..... | 354 |
|-----------------------------|-----|

## Podcasts from ANESTHESIOLOGY Promoting Medical English Learning in Non-English-speaking Countries

|                                                            |     |
|------------------------------------------------------------|-----|
| <i>C. Liang, X. Zhang, F. Fang, J. Cang, C. Miao</i> ..... | 355 |
|------------------------------------------------------------|-----|

## Erratum ..... 357

## Anesthesiology Reflections from the Wood Library-Museum

### Life from Death: The Tragedy and Heroism of Dr. Paluel J. Flagg

|                                                  |     |
|--------------------------------------------------|-----|
| <i>Jane S. Moon and Melissa L. Coleman</i> ..... | 218 |
|--------------------------------------------------|-----|

### A “Soothing” Syrup? How “Father” Wiley Saved Infants from “Mother” Winslow’s Morphine Elixir

|                                                  |     |
|--------------------------------------------------|-----|
| <i>Melissa L. Coleman and Jane S. Moon</i> ..... | 261 |
|--------------------------------------------------|-----|

## Careers & Events ..... 19A

## INSTRUCTIONS FOR AUTHORS

The most recently updated version of the Instructions for Authors is available at [www.anesthesiology.org](http://www.anesthesiology.org). Please refer to the Instructions for the preparation of any material for submission to ANESTHESIOLOGY.

Manuscripts submitted for consideration for publication must be submitted in electronic format via Editorial Manager (<https://www.editorialmanager.com/ain>). Detailed directions for submission and the most recent version of the Instructions for Authors can be found on the Journal’s Web site (<http://www.anesthesiology.org>). Books and educational materials for review should be sent to Alan Jay Schwartz, M.D., M.S.Ed., Director of Education, Department of Anesthesiology and Critical Care Medicine, The Children’s Hospital of Philadelphia,

34th Street and Civic Center Blvd., Room 9327, Philadelphia, Pennsylvania 19104-4399. Article-specific permission requests are managed with Copyright Clearance Center’s Rightslink service. Information can be accessed directly from articles on the journal Web site. More information is available at <http://anesthesiology.pubs.asahq.org/public/rightsandpermissions.aspx>. For questions about the Rightslink service, e-mail [customer-care@copyright.com](mailto:customer-care@copyright.com) or call 877-622-5543 (U.S. only) or 978-777-9929. Advertising and related correspondence should be addressed to Advertising Manager, ANESTHESIOLOGY, Wolters Kluwer Health, Inc., Two Commerce Square, 2001 Market Street, Philadelphia, Pennsylvania 19103 (Web site: <http://www.wkcenter.com/>). Publication of an advertisement in ANESTHESIOLOGY does not constitute endorsement by the Society or Wolters Kluwer Health, Inc. of the product or service described therein or of any representations made by the advertiser with respect to the product or service.

**ANESTHESIOLOGY** (ISSN 0003-3022) is published monthly by Wolters Kluwer Health, Inc., 14700 Citicorp Drive, Bldg 3, Hagerstown, MD 21742. Business office: Two Commerce Square, 2001 Market Street, Philadelphia, PA 19103. Periodicals postage paid at Hagerstown, MD, and at additional mailing offices. Copyright © 2021, the American Society of Anesthesiologists, Inc. All Rights Reserved.

**Annual Subscription Rates:** *United States*—\$1077 Individual, \$2671 Institution, \$434 In-training. *Rest of World*—\$1136 Individual, \$2965 Institution, \$434 In-training. Single copy rate \$266. Subscriptions outside of North America must add \$58 for airfreight delivery. Add state sales tax, where applicable. The GST tax of 7% must be added to all orders shipped to Canada (Wolters Kluwer Health, Inc.’s GST Identification #895524239, Publications Mail Agreement #1119672). Indicate in-training status and name of institution. Institution rates apply to libraries, hospitals, corporations, and partnerships of three or more individuals. Subscription prices outside the United States must be prepaid. Prices subject to change without notice. Subscriptions will begin with currently available issue unless otherwise requested. Visit us online at [www.lww.com](http://www.lww.com).

Individual and in-training subscription rates include print and access to the online version. Online-only subscriptions for individuals (\$356) and persons in training (\$356) are available to nonmembers and may be ordered by downloading a copy of the Online Subscription FAXback Form from the Web site, completing the information requested, and faxing the completed form to 301-223-2400. Institutional rates are for print only; online subscriptions are available via Ovid. Institutions can choose to purchase a print and online subscription together for a discounted rate. Institutions that wish to purchase a print subscription, please contact Wolters Kluwer Health, Inc.,

14700 Citicorp Drive, Bldg 3, Hagerstown, MD 21742; phone: 800-638-3030; fax: 301-223-2400. Institutions that wish to purchase an online subscription or online with print, please contact the Ovid Regional Sales Office near you or visit [www.ovid.com/site/index.jsp](http://www.ovid.com/site/index.jsp) and select Contact and Locations.

**Address for non-member subscription information, orders, or change of address:** Wolters Kluwer Health, Inc., 14700 Citicorp Drive, Bldg 3, Hagerstown, MD 21742; phone: 800-638-3030; fax: 301-223-2400.

**Address for member subscription information, orders, or change of address:** Members of the American Society of Anesthesiologists receive the print and online journal with their membership. To become a member or provide a change of address, please contact the American Society of Anesthesiologists, 1061 American Lane, Schaumburg, Illinois 60173-4973; phone: 847-825-5586; fax: 847-825-1692; e-mail: [membership@ASAHQ.org](mailto:membership@ASAHQ.org). For all other membership inquiries, contact Wolters Kluwer Health, Inc., Customer Service Department, P.O. Box 1610, Hagerstown, MD 21740; phone: 800-638-3030; fax: 301-223-2400.

**Postmaster:** Send address changes to ANESTHESIOLOGY, P.O. BOX 1610, Hagerstown, MD 21740.

**Advertising:** Please contact Hilary Druker, National Account Manager, Health Learning, Research & Practice, Medical Journals, Wolters Kluwer Health, Inc.; phone: 609-304-9187; e-mail: [Hilary.Druker@wolterskluwer.com](mailto:Hilary.Druker@wolterskluwer.com). For classified advertising: Dave Wiegand, Recruitment Advertising Representative, Wolters Kluwer Health, Inc.; phone: 847-361-6128; e-mail: [Dave.Wiegand@wolterskluwer.com](mailto:Dave.Wiegand@wolterskluwer.com).
